# Supplementary material for: Avermectin Trunk Injections: A Promising Approach for Managing the Walnut Husk Fly (Rhagoletis completa)
Source: MDPI journal article supplement (doi:10.3390/horticulturae9060655), 2023-06-01
Supplement: s1 [file s1]

## Supplement, Injection devices

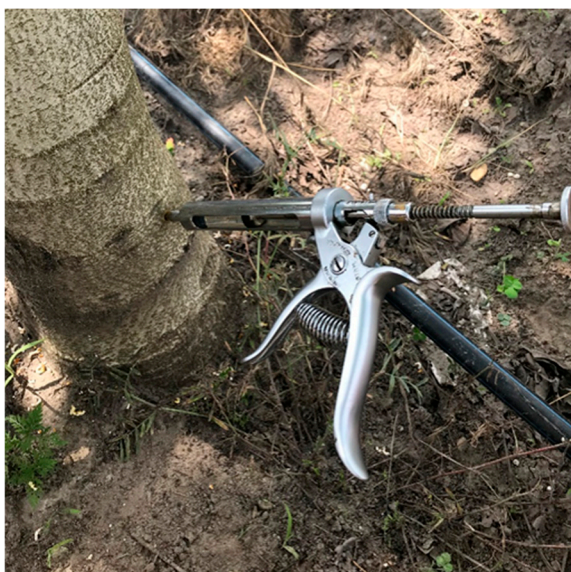

Figure S1. Treenject injection tool

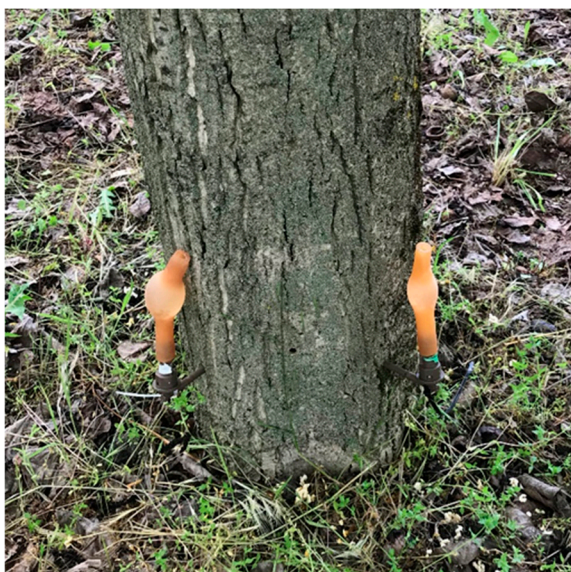

Figure S2. Pressurised rubber injection bag (Ynject GO)

Supplement, The first signs of the larvicidal effect and the signs of successful treatments on the husk

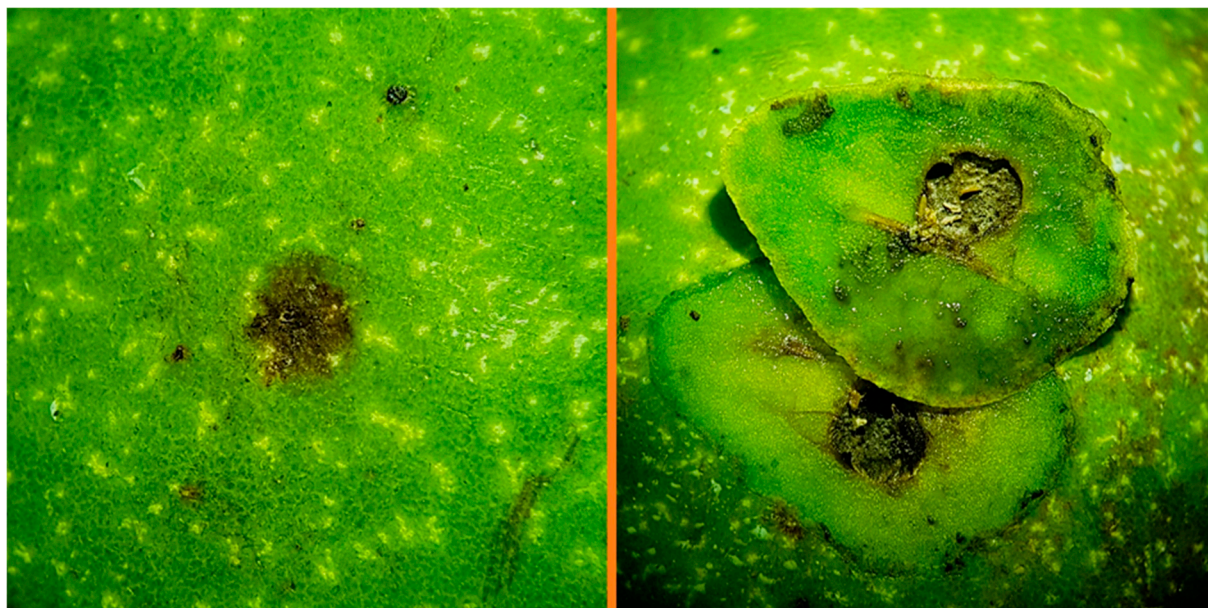

Figure S3. The oviposition site on the green walnut husk (**left side**) and the dead young maggots in the mesocarp (**right side**)

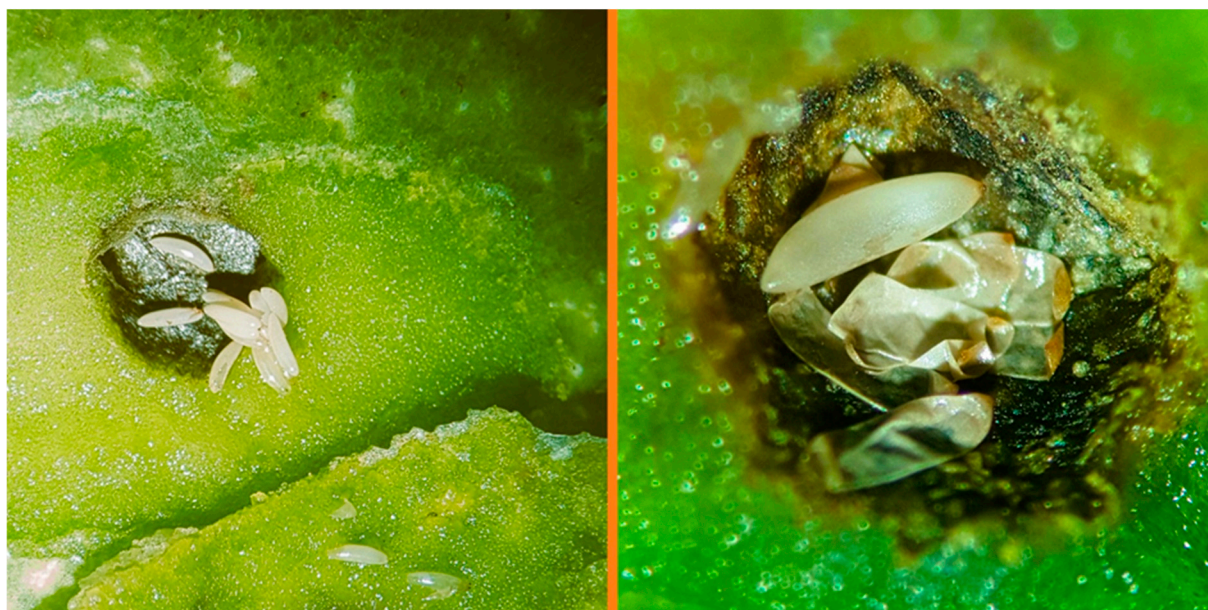

Figure S4. The live maggots in the pericarp (**right side**) and the maggots killed as a result of the treatment (**left side**).



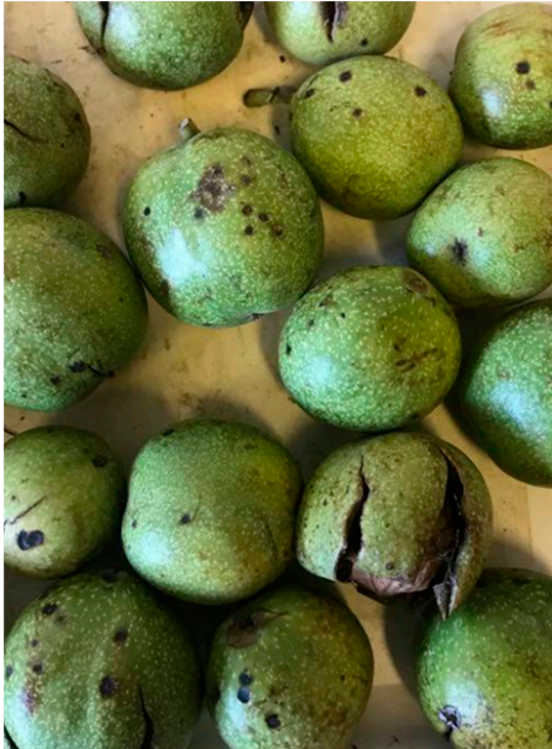

Figure S5. Small, black, dry spots on the husk as a consequence of oviposition.

#### Supplement, Side effects and wound healing

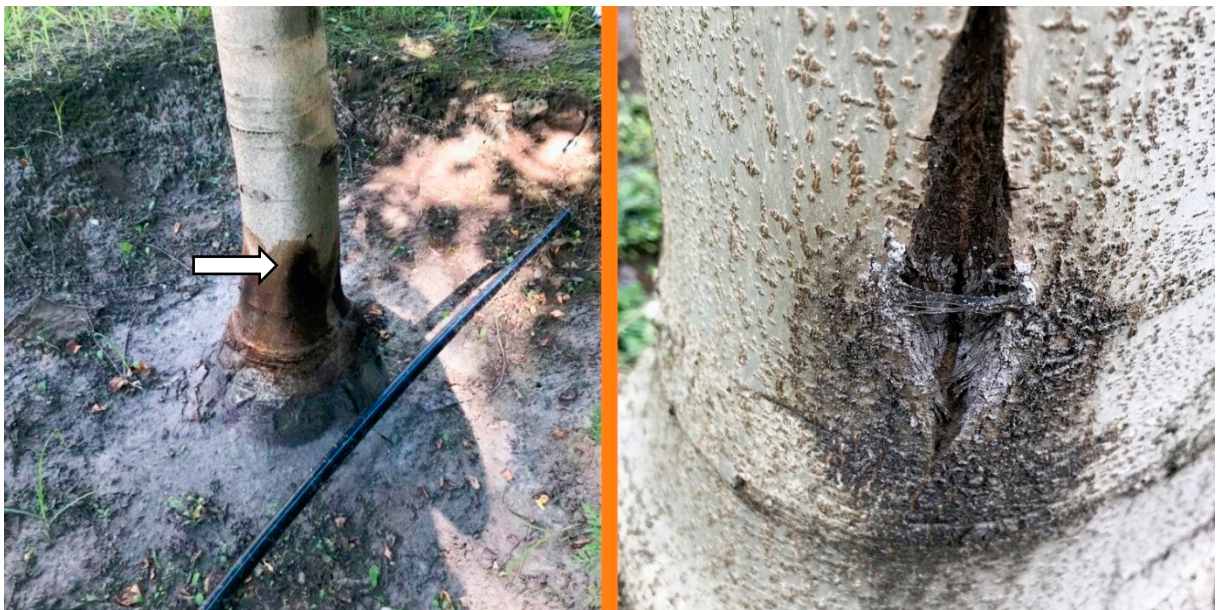

Figure S6. Side effects due to the use of a plant protection product not suited for injection in the year of the treatment (left, 15th of October 2020) and one year later (right, 18th of May 2021).

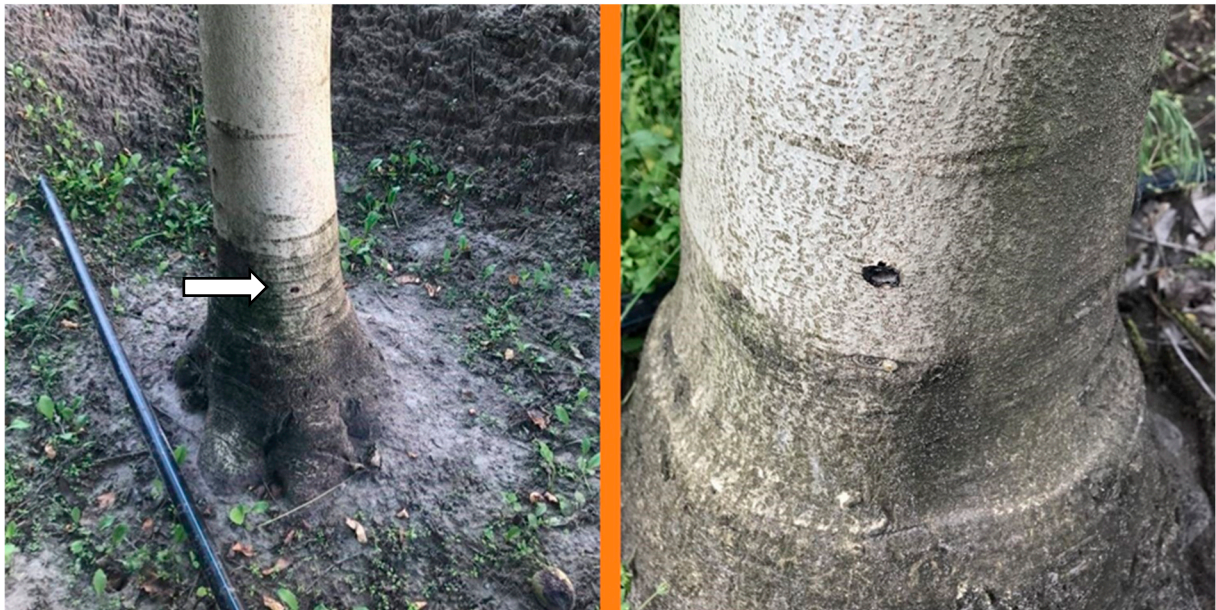

Figure S7 Absence of side effects due to the use of a plant protection product intended for trunk injection in the year of the treatment (left, 15th of October 2020) and one year later (right, 18th of May 2021)
