# Supplementary material for: Avermectin Trunk Injections: A Promising Approach for Managing the Walnut Husk Fly (Rhagoletis completa)
Source: MDPI journal article supplement (doi:10.3390/horticulturae9060655), 2023-06-01
Supplement: s1 [file s1]

Archive with 1 entries (1 files):
- horticulturae-2386592-supplementary.pdf
